# Supplementary material
Source: publisher figshare collection journal article supplement (https://tandf.figshare.com/ndownloader/files/21997494)
Supplement: Supplementary file 1 [file 21997494]

Supplementary material for Norheim K.B, Jonsson G, Harboe E, Hanasand M, Gøransson L, Omdal R. Oxidative stress, as measured by protein oxidation, is increased in primary Sjögren's syndrome *Free Radical Research* 2012; 46(2): 141–146.

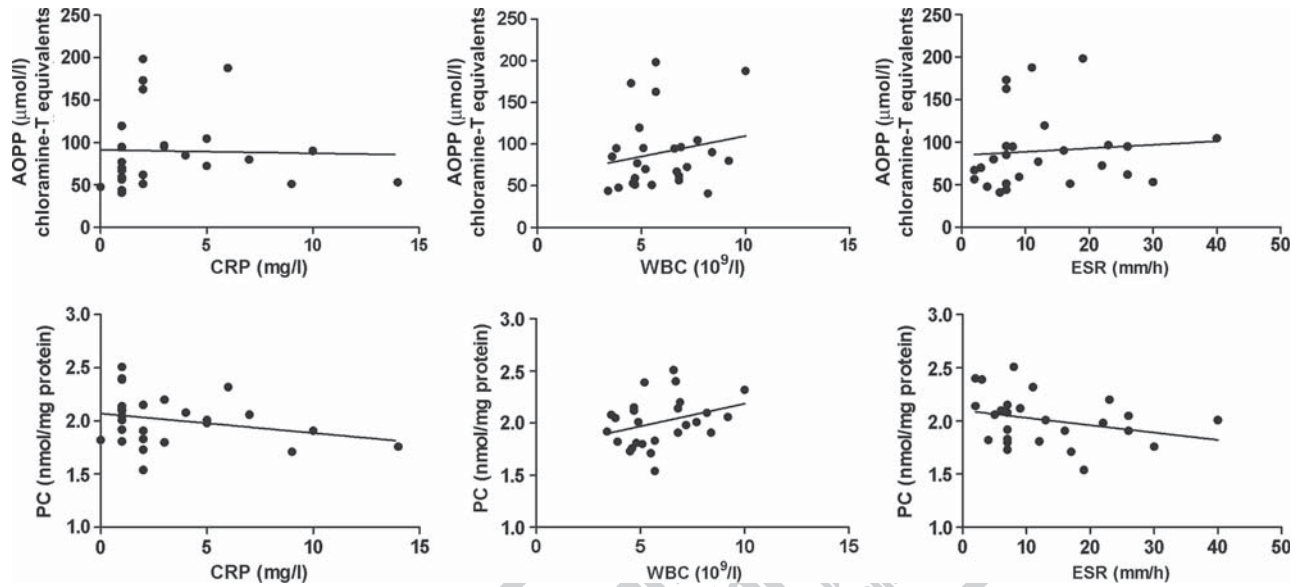

Supplementary Figure 1. Scatterplot of AOPP and PC versus WBC, CRP and ESR in pSS patients. AOPP, advanced oxidation protein products; CRP, C-reactive protein; ESR, erythrocyte sedimentation rate; PC, protein carbonyl; pSS, primary Sjögren's syndrome; WBC, white blood cells.
